# Supplementary material
Source: PubMed Central journal article supplement (PMC4401034)
Supplement: NIHMS679998-supplement-Supplemental.pdf [file NIHMS679998-supplement-Supplemental.pdf]

SUPPLEMENTARY MATERIALS

for

**“Engineering alcohol tolerance in yeast”**

Felix H. Lam, Adel Ghaderi, Gerald R. Fink\*, Gregory Stephanopoulos\*

\* Correspondence to: G.R.F. ([gfink@wi.mit.edu](mailto:gfink@wi.mit.edu)) or G.S. ([gregstep@mit.edu](mailto:gregstep@mit.edu))

## Contents

### Materials and Methods

|                                                                 |     |
|-----------------------------------------------------------------|-----|
| Determination of dry cell weight .....                          | S3  |
| Yeast strains .....                                             | S3  |
| Plasmid construction .....                                      | S4  |
| Media and fermentation conditions .....                         | S5  |
| Ethanol, glucose, acetic acid, and glycerol determination ..... | S8  |
| Viability measurements .....                                    | S8  |
| Alcohol shock tolerance assay .....                             | S9  |
| Specific productivity .....                                     | S10 |
| Phosphate measurements .....                                    | S11 |
| Anaerobic bioreactor fermentations .....                        | S11 |
| Statistical analysis .....                                      | S11 |

### Discussion

|                                                                           |     |
|---------------------------------------------------------------------------|-----|
| Genetic debilitation of K <sup>+</sup> and H <sup>+</sup> transport ..... | S12 |
| Elevated K <sup>+</sup> and pH, and nutrient depletion .....              | S12 |

|                          |     |
|--------------------------|-----|
| References (26–31) ..... | S13 |
|--------------------------|-----|

Figures S1–S13

Tables S1–S3

## Materials and Methods

**Determination of dry cell weight.** Dry cell weight (DCW) was determined by vacuum filtration using 0.2  $\mu\text{m}$  cellulose nitrate membrane filters (Whatman #10401312, <http://www.gelifesciences.com/Whatman>). For each measurement, the filter was pre-weighed with hundredth mg precision using a Mettler Toledo microbalance (#AX105, <http://www.mt.com>), inserted into a vacuum flask, and wet with deionized water. A 1 mL sample was deposited and washed twice with an equal volume of deionized water. Final weight was determined after drying for 16 h in a 70°C oven. DCW was measured at five points during the course of fermentation for which optical density ( $\text{OD}_{600}$ ) was also measured. For each time point, 1 mL of fresh medium was also measured (control) and any change in weight was subtracted from weight changes of other filter samples at that time point. All measurements were performed in duplicate including controls. DCW was found to correspond to  $\text{OD}_{600}$  as  $0.396 \pm 0.025 \text{ g DCW} \cdot \text{L}^{-1} \cdot \text{OD}_{600}^{-1}$ .

**Yeast strains.** To generate homozygous double deletions of *PPZ1* and *PPZ2*, the *MAT $\alpha$  ppz1 $\Delta$*  and *MAT $\alpha$  ppz2 $\Delta$*  haploids were sourced from the Saccharomyces Genome Deletion Project collection (Life Technologies, <http://clones.invitrogen.com/cloneinfo.php?clone=yeast>), and mated to produce the diploid strain *ppz1 $\Delta$ ::kanMX4 / PPZ1 ppz2 $\Delta$ ::kanMX4 / PPZ2*. This heterozygote was sporulated, and ascospores dissected onto yeast extract-peptone-dextrose (YPD) plates containing 200  $\mu\text{g}/\text{mL}$  G418 (Sigma-Aldrich #A1720, <http://www.sigmaaldrich.com>). Haploids that germinated from tetrads exhibiting a 2:2 segregation pattern unambiguously harbored the kanMX4 deletion cassette at both the *PPZ1* and

*PPZ2* loci (17). The genotypes of these G418-resistant haploids were further verified by PCR using promoter- and kanMX4-specific primers, and subsequently assayed for mating type via the halo test for pheromone production (using tester strains F1441 and L4564 sensitive to  $\alpha$ - and a-factor, respectively) (26). Haploids of the opposite mating type were then crossed to produce the homozygous double deletion strain LAMy177.

To create plasmid-carrying yeast strains, transformation of DNA was performed following the lithium acetate-based protocol of Gietz (27). Typically, 500 ng of URA3-encoding plasmid was introduced into 2–3 OD<sub>600</sub> units (0.8–1.2 g DCW) of yeast cells grown to mid-logarithmic phase. Transformants were recovered through uracil prototrophy and further verified for the presence of the exogenous DNA by PCR using primers specific to the plasmid.

See Table S1 for a complete list of yeast strains used in this study.

**Plasmid construction.** All plasmids used in this study were based on the yeast p426TEF high copy over-expression vector of Mumberg (28). To clone *PMA1*, a 5' primer encoding a SpeI restriction site and a 3' primer encoding an XhoI site were used to amplify the *PMA1* coding sequence from BY4743 genomic DNA. Amplification reactions were performed using the Phusion high-fidelity polymerase (New England Biolabs #M0530L, <http://www.neb.com>) in 50  $\mu$ l volumes containing HF buffer, and thermocycled using the routine 3 step program for 35 iterations in accordance with the manufacturer's instructions. Approximately 3  $\mu$ g of both the p426TEF vector and ethanol-precipitated *PMA1* amplicon were double digested with SpeI (New England Biolabs #R0133L) and XhoI (New England Biolabs #R0146L) for 3 h. Linearized p426TEF was immediately dephosphorylated with alkaline phosphatase (New England Biolabs #M0290L) for 1 h at 37°C and purified via gel extraction using the QIAquick Gel Extraction Kit

(QIAGEN #28706, <http://www.qiagen.com>). The digested *PMAI* insert was column purified using the QIAquick PCR Purification Kit (QIAGEN #28106).

Ligation of *PMAI* to p426TEF was performed using a minimum 5 insert:1 vector molar ratio in a 20  $\mu$ l reaction with T4 DNA ligase (New England Biolabs #M0202L) according to the manufacturer's instructions; however, twice the recommended amount of enzyme was used. Reaction mixtures were transformed into chemically competent NEB 5 $\alpha$ F'<sup>l</sup> *E. coli* (New England Biolabs #C2992H), and ampicillin-resistant colonies screened for successful ligations by PCR using backbone- and gene-specific primers. Candidate plasmids were purified from *E. coli* cultures using the QIAprep Spin Miniprep Kit (QIAGEN #27106), and Sanger sequenced to evaluate fidelity of the ligation products.

See Table S2 for a complete list of plasmids used in this study.

**Media and fermentation conditions.** Unless noted otherwise, yeast strains were cultured in synthetic complete medium (YSC) made from Yeast Nitrogen Base (BD-Difco #233520, <http://www.bd.com>) and amino acids and remaining additives from Sigma-Aldrich (17). For conditions requiring plasmid maintenance, YSC lacking uracil (YSC –URA) was used. For fermentations using yeast extract-peptone (YP) medium, undiluted formulations contained the standard 10 g/L yeast extract (BD-Difco #212750) and 20 g/L peptone (BD-Difco #211830) (17), while dilutions contained these two components decreased in proportion (e.g., 2 g/L yeast extract + 4 g/L peptone in the 20% dilution).

All yeast cultures were incubated at 30°C with agitation. Cultures  $\geq$  25 mL were grown in Erlenmeyer flasks on a platform shaker set at 200 RPM, and cultures  $\leq$  12 mL in glass tubes on a roller drum at the maximum rotational setting.

To build yeast biomass and adapt cells osmotically for high cell density and high sugar fermentations, starter cultures consisting of unmodified medium (i.e., YSC, YSC –URA, or YP dilution) and 0.33× the target fermentation sugar concentration (e.g., 100 g/L glucose) were grown until saturation, pelleted by centrifugation, and the entire cell mass used to inoculate a “pre-fermentation” culture of the same medium and 0.5–0.66× the target sugar concentration (e.g., 150 g/L glucose). Pre-fermentation cultures were grown until saturation, washed once in the same volume of fresh medium to remove residual ethanol, re-suspended in fresh medium, and cell densities (of an appropriate dilution) determined by absorbance at 600 nm. Equalized quantities of cells were then harvested by centrifugation, re-suspended in fermentation medium to yield a starting cell density of approximately  $OD_{600} = 25$  (9.9 g DCW/L), and divided into triplicate 12 mL samples. Fermentation media contained the target high concentration of sugar (300 g/L glucose or 100 g/L xylose), as well as any supplements under evaluation (e.g., 40 mM KCl).

For the adjustment of pH during fermentation (Fig. 1A–B, 2A, S2, S4, S5, S8, S11), a total of 10 mM potassium hydroxide (KOH) was added in the following amounts and times: 2 mM at 3, 6, 12 h; 1.5 mM at 24, 36 h; and 1 mM at 48 h. Equal amounts of water were added to unmodified YSC fermentations to control for changes in volume. In fermentations dissecting the component effects of potassium ( $K^+$ ) and pH (fig. S4, S5), equal amounts of KCl were added in lieu of KOH at the same time points. To monitor pH, acidity of the fermentation medium was measured directly using a Thermo Scientific Orion 2-STAR pH meter (#1111001, <http://www.thermoscientific.com>) with AquaPro electrode (#9156APWP). Cross contamination was minimized by immersing the pH probe in HCl, pH 1 for several minutes and rinsing thoroughly with ddH<sub>2</sub>O (double distilled via Millipore Milli-Q system) between samples.

Fermentations assessing the quantitative effect of  $K^+$  concentration and pH on ethanol tolerance and production (Fig. 1C–D, S7) were modified from the above as follows. In lieu of pH adjustments made during the course of fermentation, cells were inoculated directly into media prepared with supplemental 5–100 mM KCl (“pH 3.6”), or that prepared with supplemental 5 mM KOH and 5–95 mM KCl (“pH 5.8”). Furthermore, because these data were intended specifically for regression analysis, samples were collected in singlicate. First, we reasoned that the statistical power provided by  $n=10$  for regression was sufficient such that the necessity for triplicates was minimized. Second, because fermentations performed in YSC exhibit low variability (e.g., Fig. 1A, 2A), we felt that the prospect of handling 3× the samples would, in fact, introduce more error than managing 10 samples. Finally, the 10 data points shown were all collected in a single experiment; thus, day-to-day variability was nonexistent. Overall, when viewed in the context of regression analysis, we decided that spanning a larger range of  $K^+$ /pH conditions was more important than variability information.

Fermentations comparing the laboratory strains with augmented  $K^+$  and/or  $H^+$  gradients to industrial bioethanol strains (Fig. 3) were also modified as follows. To maximize expression of the up-regulated  $K^+$  and  $H^+$  pumps, all pre-fermentation cultures were maintained in logarithmic phase ( $OD_{600} \leq 3$  or 1.2 g DCW/L) for  $\geq 24$  h instead of grown until saturation. Equalized quantities of each strain were harvested, re-suspended in unmodified synthetic fermentation medium to yield a target cell density of  $OD_{600} = 20$  (7.9 g DCW/L), and aliquoted into triplicate samples.

All fermentations were conducted micro-aerobically: 12 mL cultures had approximately two volumes of headspace and were capped snugly with snap-on plastic tops but not sealed with Parafilm. Samples were taken every  $\sim 24$  h for analysis over the course of 1–3 d. Typically, 20

$\mu\text{L}$  of cells were removed and diluted  $50^{-1}$  for measurement of cell density at  $\text{OD}_{600}$ , another 20  $\mu\text{L}$  for quantification of cell viability by methylene blue staining (see below), and 0.5 mL of supernatant saved for determination of ethanol, glucose, acetic acid, and glycerol concentrations by HPLC (see below). Figures displaying final ethanol titers (e.g., Fig. 2, 3) show ethanol concentrations in the medium at the conclusion of fermentation (72 h).

See Table S3 for a summary of yeast strains and fermentation conditions used in each of this study's figures.

**Ethanol, glucose, acetic acid, and glycerol determination.** Concentrations of ethanol, glucose, acetic acid, and glycerol were quantified chromatographically on 0.5 mL of undiluted sample using an Agilent 1200 Series HPLC (<http://www.chem.agilent.com>) equipped with an Agilent 1260 Infinity Refractive Index Detector (#G1362A RID) and Aminex HPX-87H Ion Exclusion Column (Bio-Rad #125-0140, <http://www.bio-rad.com>). Using a 5 mM sulfuric acid mobile phase at  $35^{\circ}\text{C}$  and flow rate of 0.6 mL/min, ethanol eluted at a retention time of  $\sim 20.5$  min, glucose at  $\sim 8.8$  min, acetic acid at  $\sim 15.2$  min, and glycerol at  $\sim 13.1$  min. To determine concentrations, peak areas auto-determined by the Agilent Chemstation for LC software were interpolated off a 6 point standard curve consisting of 0–20% ethanol, 0–10% glucose, 0–3% acetic acid, and 0–0.5% glycerol (all vol/vol) prepared in YSC medium.

**Viability measurements.** To assess population viability, methylene blue (Sigma-Aldrich #M9140; 10 mg/mL stock prepared in  $\text{ddH}_2\text{O}$ ) was added directly to aliquots of undiluted high cell density cultures to a final concentration of 1 mg/mL, and visualized immediately at  $400\times$  magnification on a Nikon Eclipse TS100 by bright field microscopy (29). Images were recorded



using a SPOT Insight 2 MP Firewire color camera with SPOT 5.0 software, and analyzed offline.

For each image, the number of unstained (live) cells was quantified along with the total number of cells to determine the viable population fraction. A minimum of 250 cells was counted per replicate, and error statistics calculated from the viable fractions of at least 3 replicates. Cell density measurements were multiplied by their respective viable fractions (and their standard deviations propagated) to arrive at the underlying viable population in cell density units (e.g., Fig. 1B).

All image processing and numerical analysis, including time integration of the viable cell populations, were done in MATLAB (The MathWorks, <http://www.mathworks.com>).

**Alcohol shock tolerance assay.** To isolate and quantify the ability of elevated  $K^+$  and pH to increase resistance to sudden changes in external alcohol concentration, cells were pre-adapted to high cell density and low glucose conditions before treatment with alcohol. To build cell biomass, starter cultures of FY4/5 were grown until saturation in YSC containing 50 g/L glucose. One half of the culture was centrifuged and re-suspended in YSC containing 20 g/L glucose, the other centrifuged and re-suspended in identical medium supplemented with 48 mM KCl and 2 mM KOH, and both cultured for at least 16 h to deplete glucose (verified by HPLC; data not shown). Approximately 30  $OD_{600}$  units (11.9 g DCW) of cells were then harvested in 2 mL screw cap tubes (in triplicate per alcohol concentration), washed with YSC containing 5 g/L glucose or that supplemented with 48 mM KCl and 2 mM KOH, respectively, and finally re-suspended in media of the same composition containing 24–29% ethanol, 16–21% isopropanol, or 4–7% isobutanol. Samples were incubated at room temperature on a rotator and assayed for viability by methylene blue staining after 80 min. The subsistence amount of 5 g/L glucose had

been chosen to minimize the contribution of any newly-produced ethanol (made during the course of the assay) to the imposed alcohol load.

However, to more closely mimic the osmotic conditions of high gravity fermentation, alcohol shock tolerance assays were also conducted in high glucose. These experiments were modified from the above as follows. Starter cultures of FY4/5 were grown until saturation in YSC containing 100 g/L glucose, divided in half, pelleted by centrifugation, re-suspended in either YSC or YSC +50 mM K-P<sub>i</sub> containing 300 g/L glucose, and cultured for at least 12 h. Approximately 30 OD<sub>600</sub> units (11.9 g DCW) of biomass were then harvested in triplicate 2 mL screw cap tubes, washed twice in respective fresh medium to remove accumulated ethanol, and re-suspended in medium of the same composition containing 10–20% ethanol (fig. S10A) or 4–14% isopropanol (fig. S10B). Samples were incubated at room temperature on a rotator, and viability assayed after 2:15 h for ethanol or 4 h for isopropanol. It is worth noting that, given the high glucose and high cell density conditions, any new ethanol that may be produced during the incubation period prior to viability assessment did not appear to negatively impact the enhancement conferred by elevated K<sup>+</sup> and pH.

**Specific productivity.** To calculate ethanol productivities per viable cell, rates of increase in ethanol titer over a specific period were normalized by the average viable cell density during the same period:

$$\frac{\text{EtOH}_t - \text{EtOH}_{t-1}}{\left(\frac{\text{DCW}_{\text{viable},t} + \text{DCW}_{\text{viable},t-1}}{2}\right) (t - t_{-1})} \quad [\text{g} \cdot \text{g DCW}^{-1} \cdot \text{h}^{-1}]$$

Error bars on specific productivity values were calculated from the standard deviations of the ethanol and viable cell density measurements using standard rules of uncertainty propagation.

**Phosphate measurements.** Concentrations of inorganic phosphate in fermentation media (fig. S2A) were assayed colorimetrically using the Malachite Green Phosphate Assay kit (ScienCell #8118, <http://www.sciencellonline.com>) according to the manufacturer's instructions on samples diluted  $3000^{-1}$ .

**Anaerobic bioreactor fermentations.** Bioreactor fermentations were performed using a New Brunswick Scientific BioFlo 110 Bioreactor (<http://newbrunswick.eppendorf.com/>) using a 1 L vessel. Dissolved oxygen (DO) and pH probes were calibrated according to the manufacturer's instructions. Cells were suspended in 500 mL (working volume) YSC medium containing 300 g/L glucose and 40 mM KCl. Anaerobic conditions are achieved within 25 min of inoculation. Continuous reading from the DO probe confirmed that anaerobicity was maintained throughout the remainder of fermentation. Manual injections totaling 10 mM KOH were added to the reactor at 3, 6, 12, 24, and 36 h using 167  $\mu$ L of 6 N KOH.

**Statistical analysis.** Computation of standard deviations, propagation of error, uni- and bivariate analyses of variance (ANOVA), two sample *t*-testing, and calculation of p values were all performed on biological triplicate measurements using functions from MATLAB or the Statistics Toolbox for MATLAB (The MathWorks). Linear regression modeling of viable population integrals and final ethanol titers (Fig. 1D) was also performed using the Statistics Toolbox for MATLAB. Error estimation on derived values (e.g., means, percent changes) were calculated from the standard deviations of primary measurements using standard rules of uncertainty propagation.

## Discussion

**Genetic debilitation of  $K^+$  and  $H^+$  transport.** We employed genetic deletions to determine if hindering  $K^+$  import or  $H^+$  export weakens ethanol performance. Both a complete ablation of *TRK1* and partial ablation of *PMA1* (a homozygous deletion is lethal (30, 31)) decreased titers relative to the wild type when cultured in unmodified medium (fig. S11). However, as elevated  $K^+$  and pH are capable of increasing ethanol performance in a manner dominant to strain genetics (Fig. 2A), we found that KCl and KOH supplementation rescued, and largely nullified, these genetic impairments (fig. S11).

**Elevated  $K^+$  and pH, and nutrient depletion.** We determined that supplementation with KCl and KOH does not relieve a general nutritional deficiency that may be triggered by high cell density. To address this possibility, we conducted fermentations with low cell density (initial  $OD_{600} = 0.1$  or  $0.04$  g DCW/L) and, additionally, repeated these conditions with the addition of 3% ethanol to impose a mild ethanol stress at the start of fermentation. In both scenarios, nutrients remained in abundance, yet we still observed improved ethanol performance with the addition of KCl alone or with the combination of KCl and KOH (fig. S13). Thus, elevated  $K^+$  and pH likely participate in a process specific to withstanding ethanol stress and do not alleviate resource constraints that may be created by overpopulation.

## References

26. G. F. Sprague, Assay of yeast mating reaction. *Meth Enzymol* **194**, 77–93 (1991).
27. R. D. Gietz, R. H. Schiestl, A. R. Willems, R. A. Woods, Studies on the transformation of intact yeast cells by the LiAc/SS-DNA/PEG procedure. *Yeast* **11**, 355–360 (1995).
28. D. Mumberg, R. Müller, M. Funk, Yeast vectors for the controlled expression of heterologous proteins in different genetic backgrounds. *Gene* **156**, 119–122 (1995).
29. K. A. Smart, K. M. Chambers, I. Lambert, C. Jenkins, C. A. Smart, Use of methylene violet staining procedures to determine yeast viability and vitality. *Journal of the American Society of Brewing Chemists* **57**, 18–23 (1999).
30. R. Serrano, M. C. Kielland-Brandt, G. R. Fink, Yeast plasma membrane ATPase is essential for growth and has homology with (Na<sup>+</sup> + K<sup>+</sup>), K<sup>+</sup>- and Ca<sup>2+</sup>-ATPases. *Nature* **319**, 689–693 (1986).
31. C. H. Ko, R. F. Gaber, TRK1 and TRK2 encode structurally related K<sup>+</sup> transporters in *Saccharomyces cerevisiae*. *Mol Cell Biol* **11**, 4266–4273 (1991).

**Fig. S1**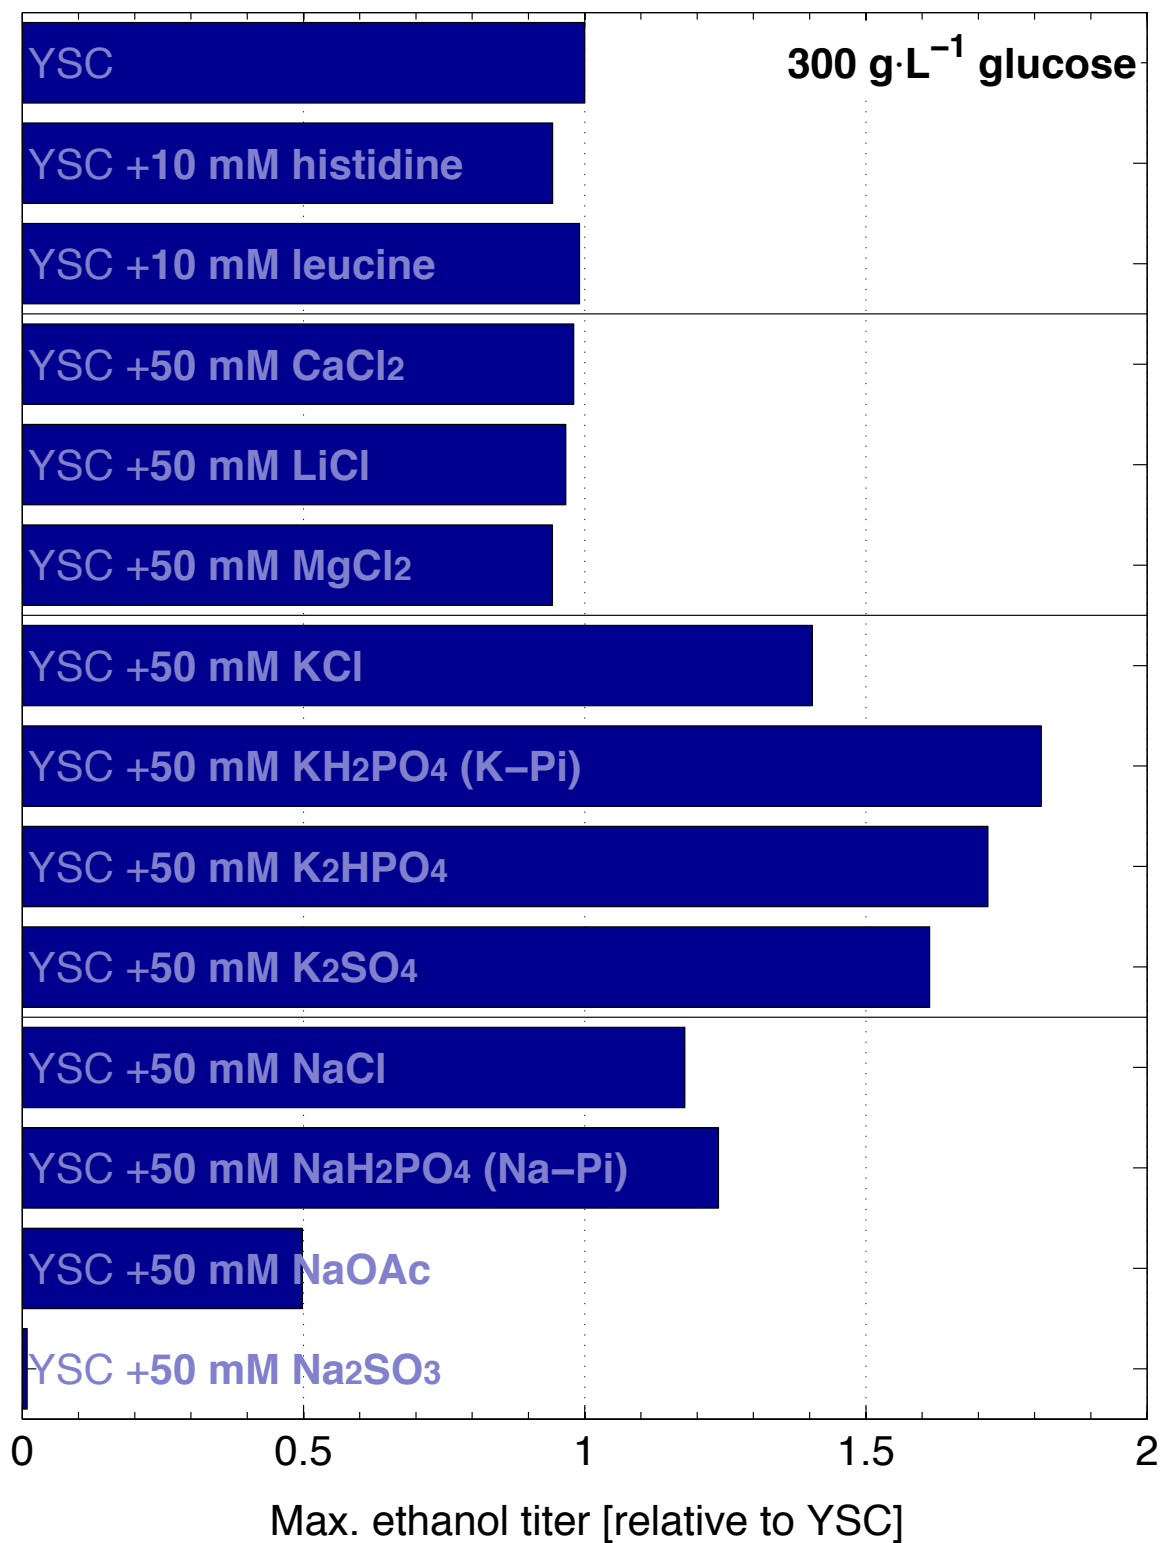

**Fig. S1.** Media supplementation with potassium-based salts exerts the largest improvement on ethanol output, with 50 mM monopotassium phosphate (K-P<sub>i</sub>) eliciting the greatest increase. The S288C laboratory prototroph was cultured for 72 h in synthetic complete medium (YSC) containing 300 g/L glucose and the indicated additives, all equalized for initial pH (3.8) and cell density (OD<sub>600</sub> = 25 or 9.9 g DCW/L).

**Fig. S2 A)**

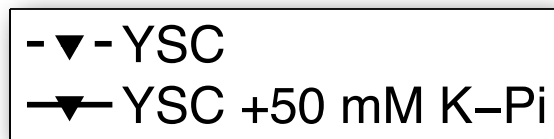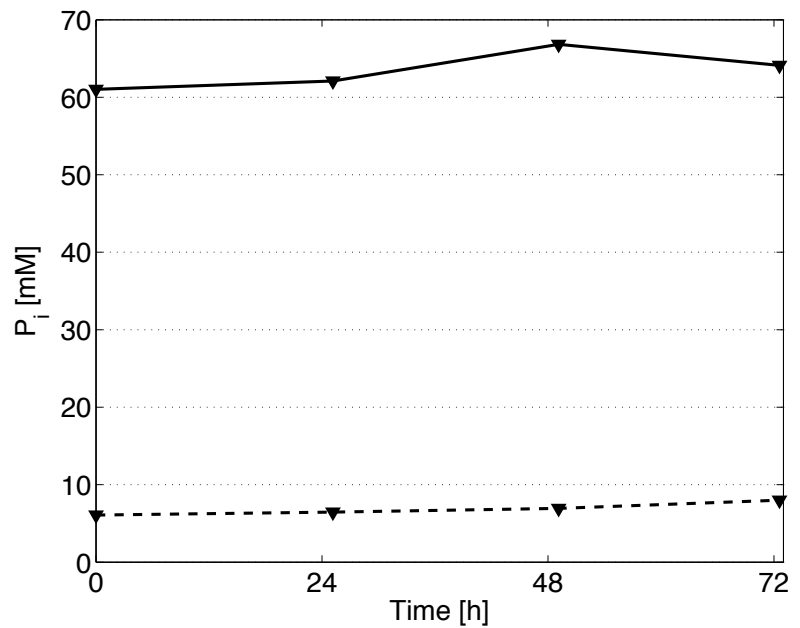

**B)**

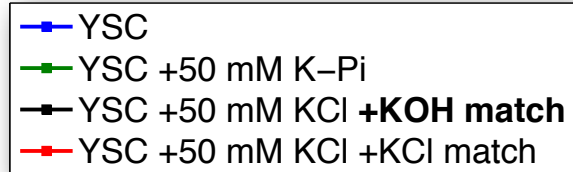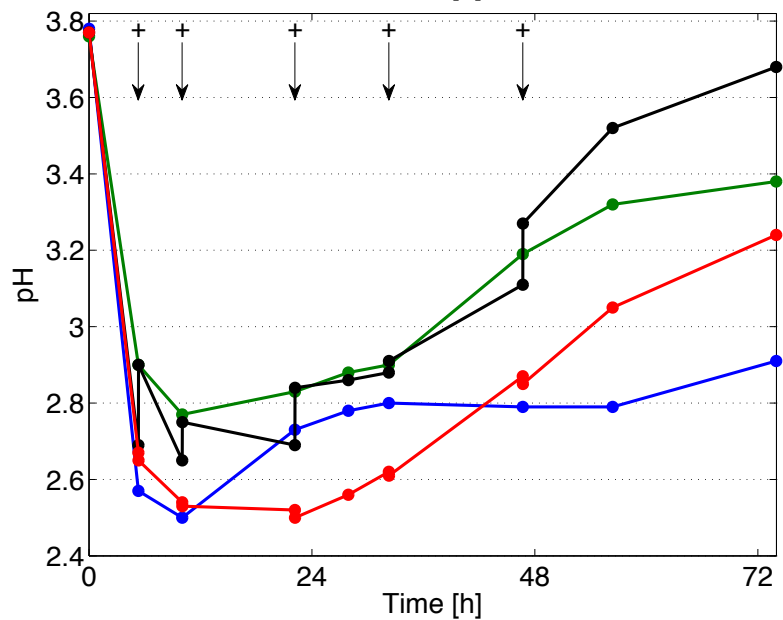

**C)**

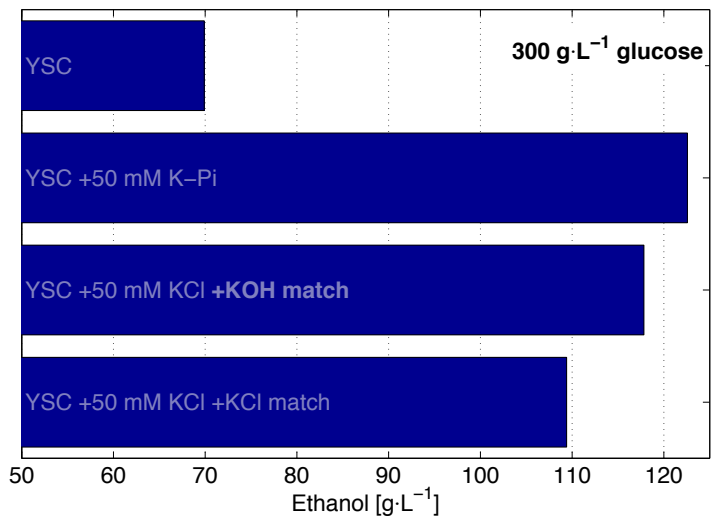

**Fig. S2.** Supplemental K- $P_i$  enhances ethanol fermentation, not by alleviating phosphate depletion, but by raising pH of the medium. **(A)** Concentrations of inorganic phosphate measured throughout fermentation in unmodified YSC (dashed) or YSC supplemented with 50 mM K- $P_i$  (solid). **(B)** Fermentation pH in unmodified YSC (blue), YSC supplemented with 50 mM K- $P_i$  (green), with 50 mM KCl and periodic additions of KOH to match that of elevated K- $P_i$  (black), or with 50 mM KCl and periodic additions of KCl equimolar to the added KOH (red). **(C)** Final ethanol titers of the fermentations in **B**.

**Fig. S3**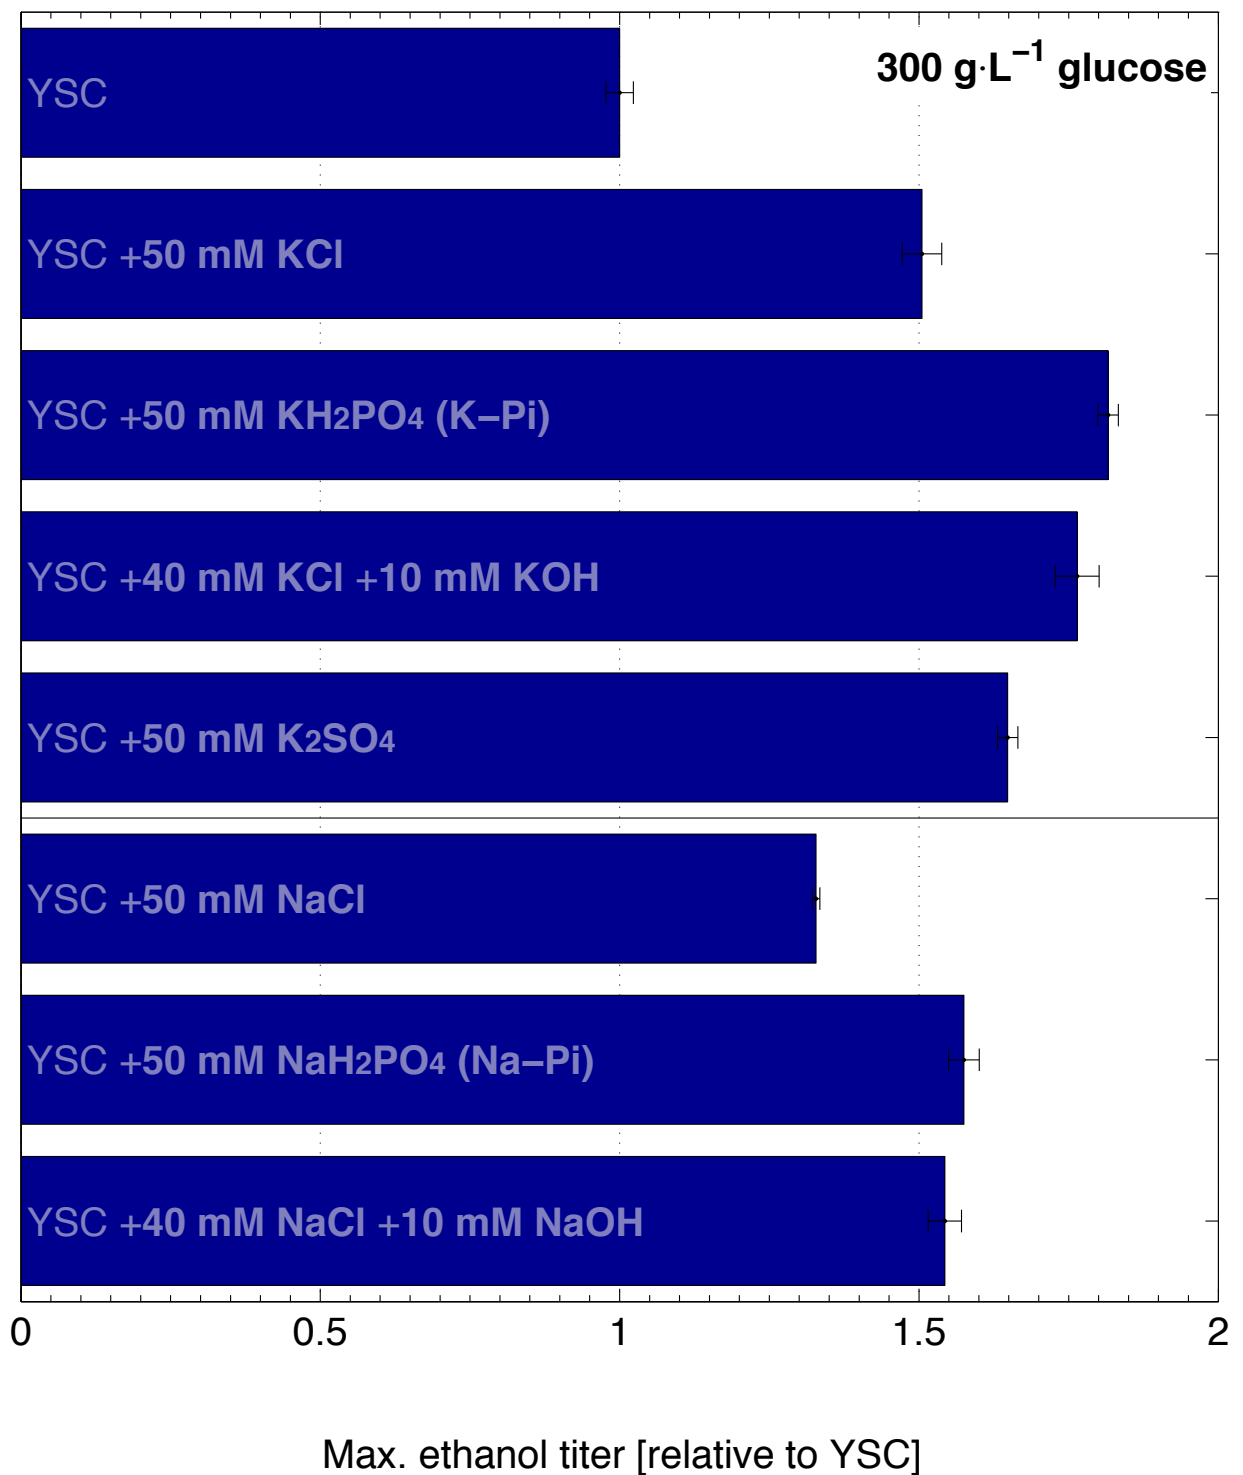

**Fig. S3.** Relative ethanol titers and analysis of variance (ANOVA) of biological triplicate fermentations conducted using YSC and the indicated supplements. Univariate ANOVA of fermentations supplemented with 50 mM K-Pi are inseparable from those with matched potassium and pH (40 mM KCl+10 mM KOH;  $p = 0.092$ ), but statistically higher than those with other potassium-based salts ( $p \leq 7.58 \times 10^{-3}$ ). Similarly, fermentations supplemented with 50 mM Na-Pi are indistinguishable from those with matched sodium and pH (40 mM NaCl+10 mM NaOH;  $p = 0.217$ ), but higher than those with NaCl alone ( $p \leq 1.96 \times 10^{-4}$ ). Bivariate ANOVA confirms that the increase conferred by potassium over sodium is significant ( $p = 5.1 \times 10^{-7}$ ), while that of phosphate vs. raised pH is insignificant ( $p = 0.031$ ).



**Fig. S4**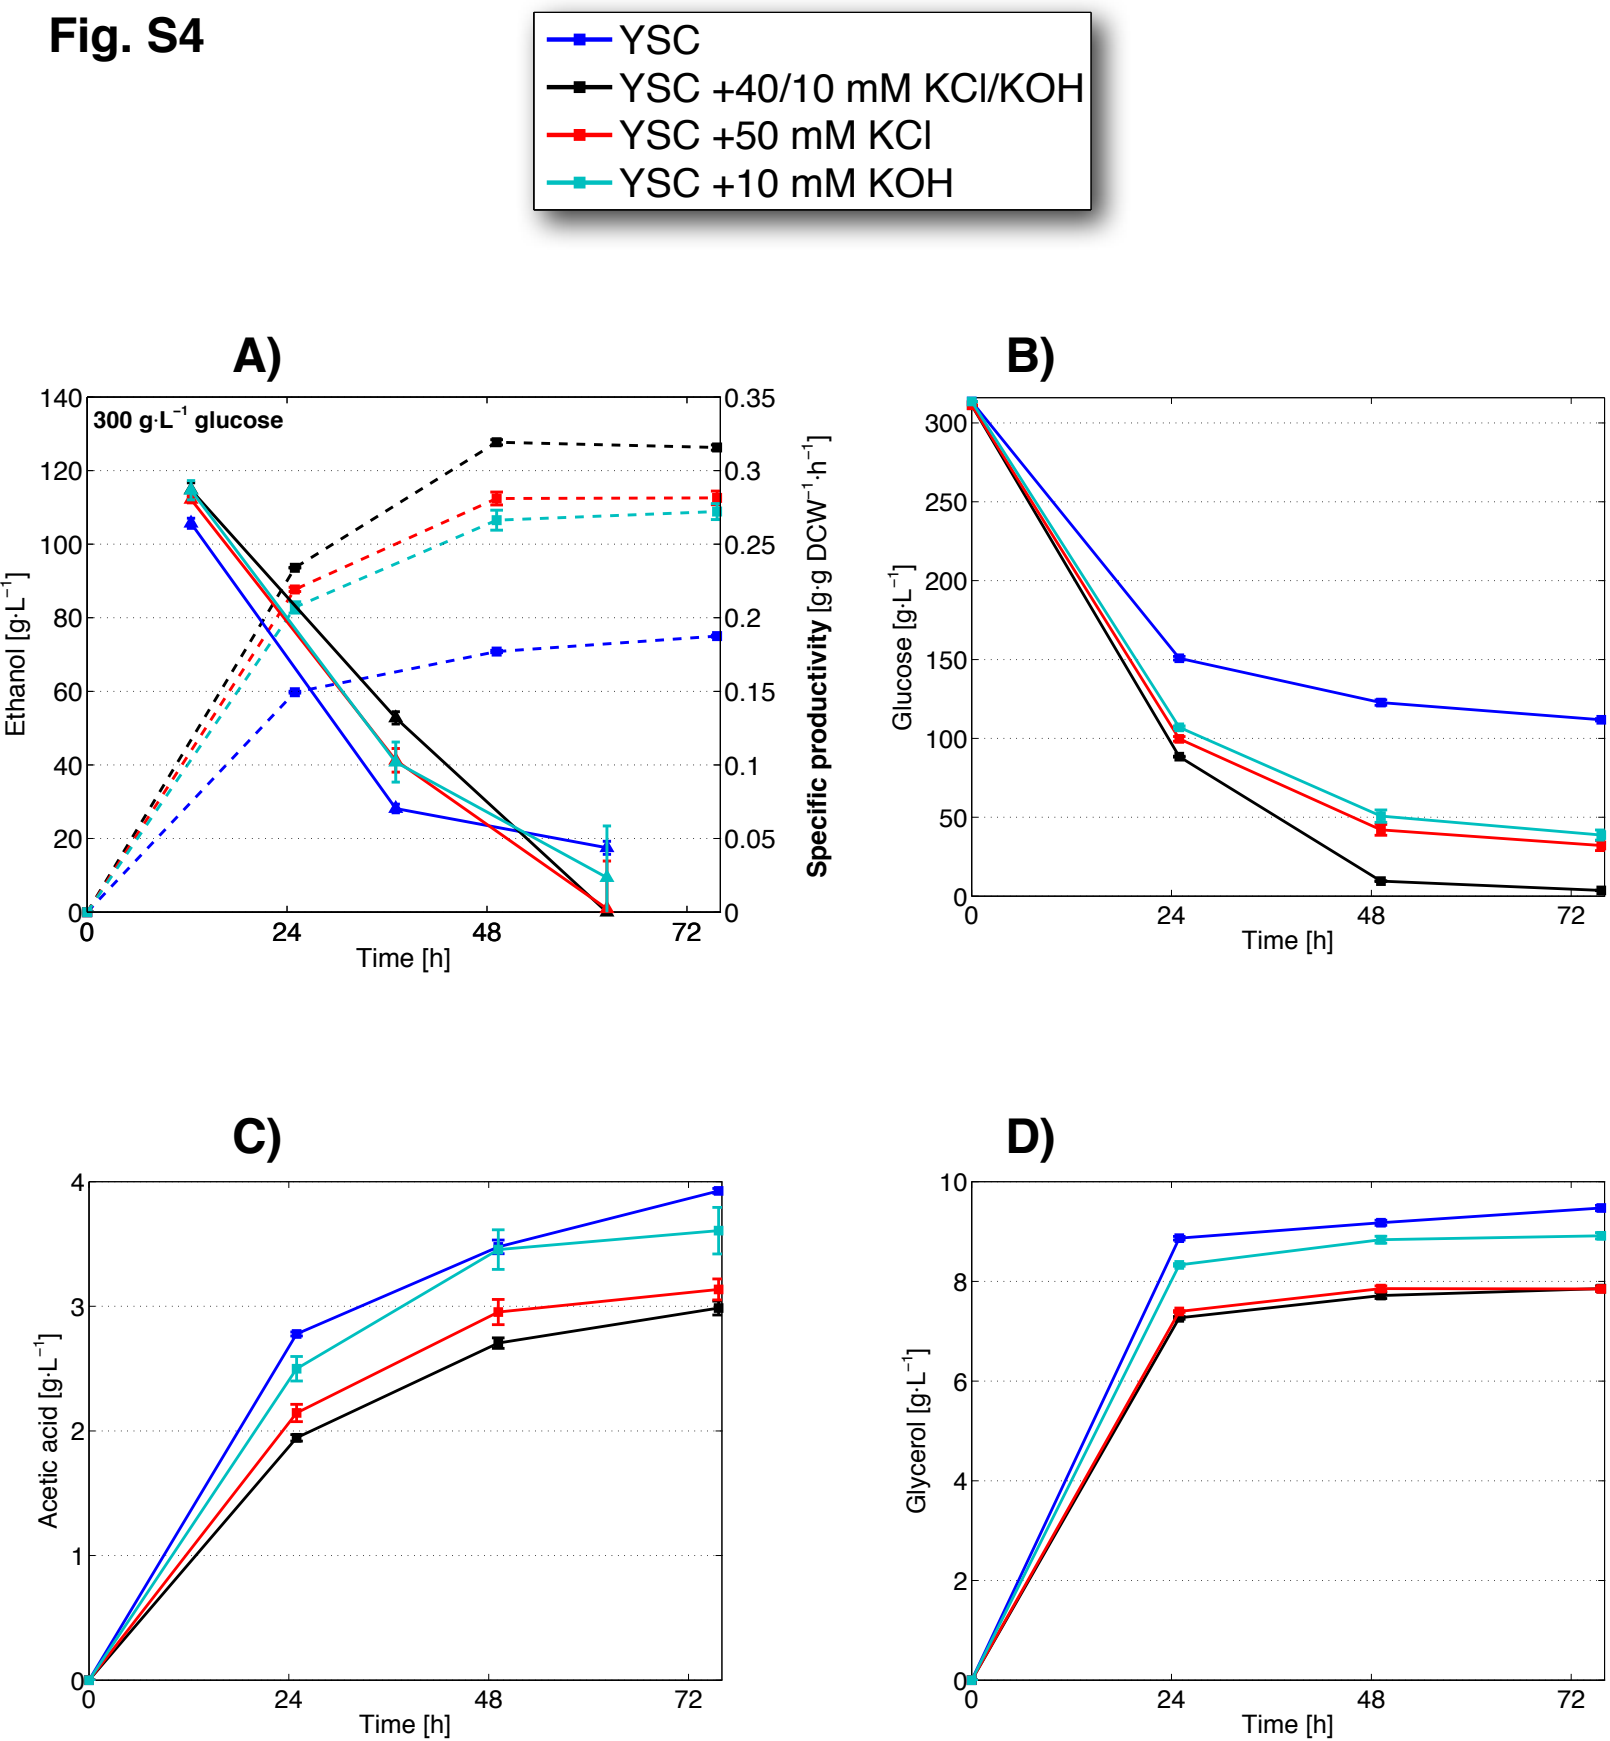

**Fig. S4.** Elevated potassium and pH (black) improve ethanol fermentation characteristics over equimolar potassium (red) or matched pH (cyan) alone. **(A)** Time course of ethanol production (dashed) and specific productivities (solid) calculated from the mean viable populations in fig. S5B. **(B, C, D)** Corresponding time courses of glucose consumption, acetate production, and glycerol production. Data are mean  $\pm$  SD from 3 biological replicates.

**Fig. S5 A)**

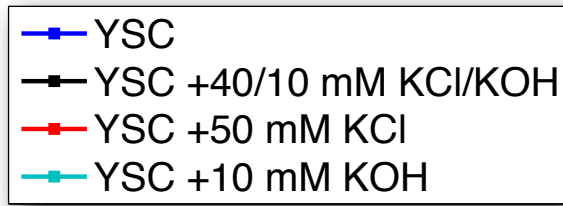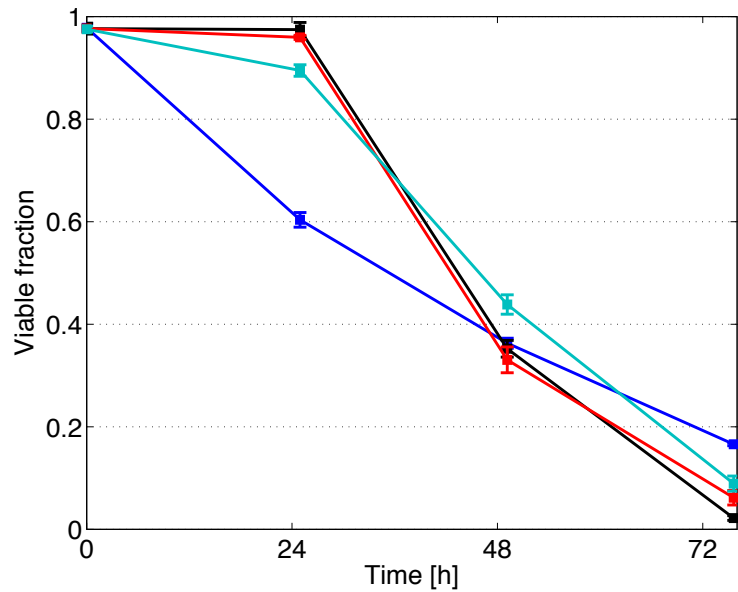

**B)**

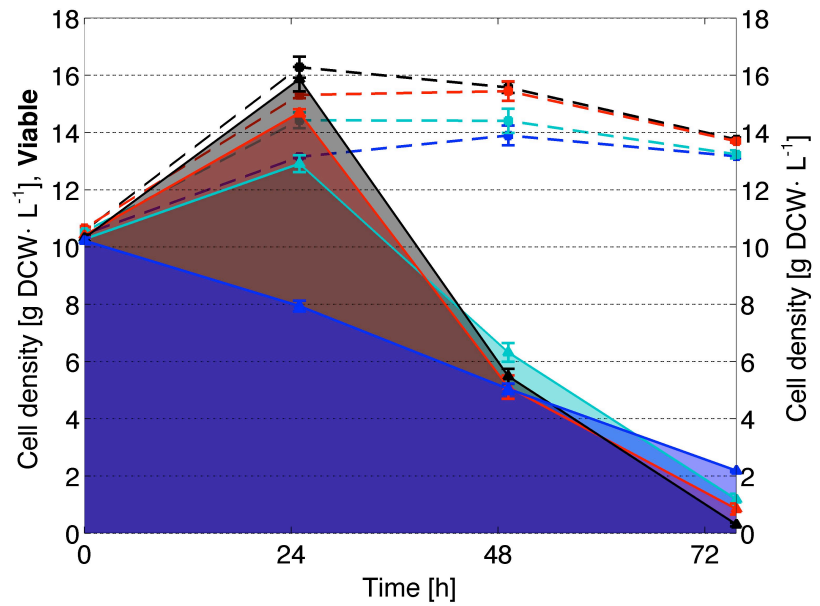

**C)**

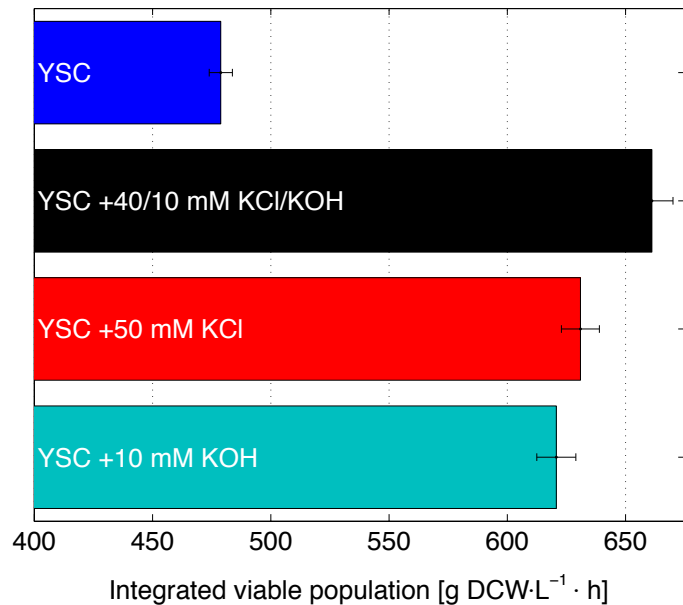

**Fig. S5.** Elevated potassium and pH (black) enhance ethanol tolerance over equimolar potassium (red) or matched pH (cyan) alone. **(A)** Viable cell fractions quantified from the fermentations in fig. S4. **(B)** Cell densities (dashed) and the corresponding underlying viable cell populations (solid) calculated from the fractions in **A**. Time integrals of the viable population (shaded) represent the net fermentation viability or total impact of supplementation on ethanol tolerance. **(C)** Quantification of the time integrals in **B**.

**Fig. S6 A)**

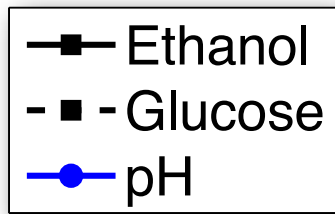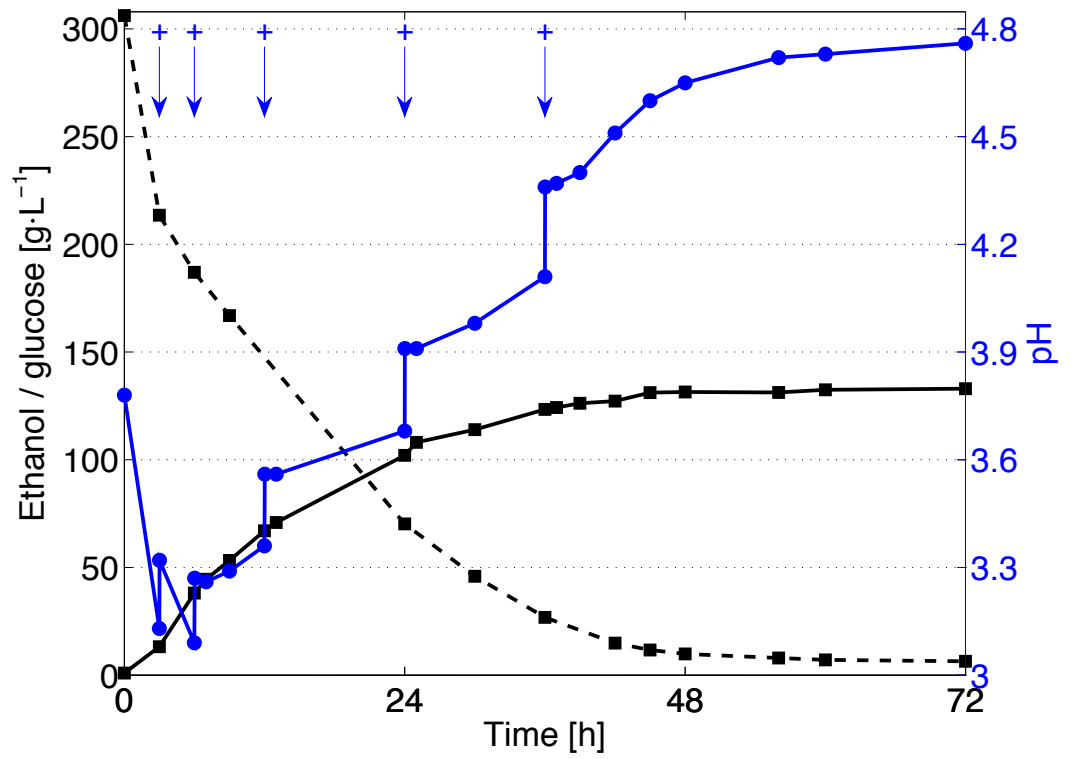

**B)**

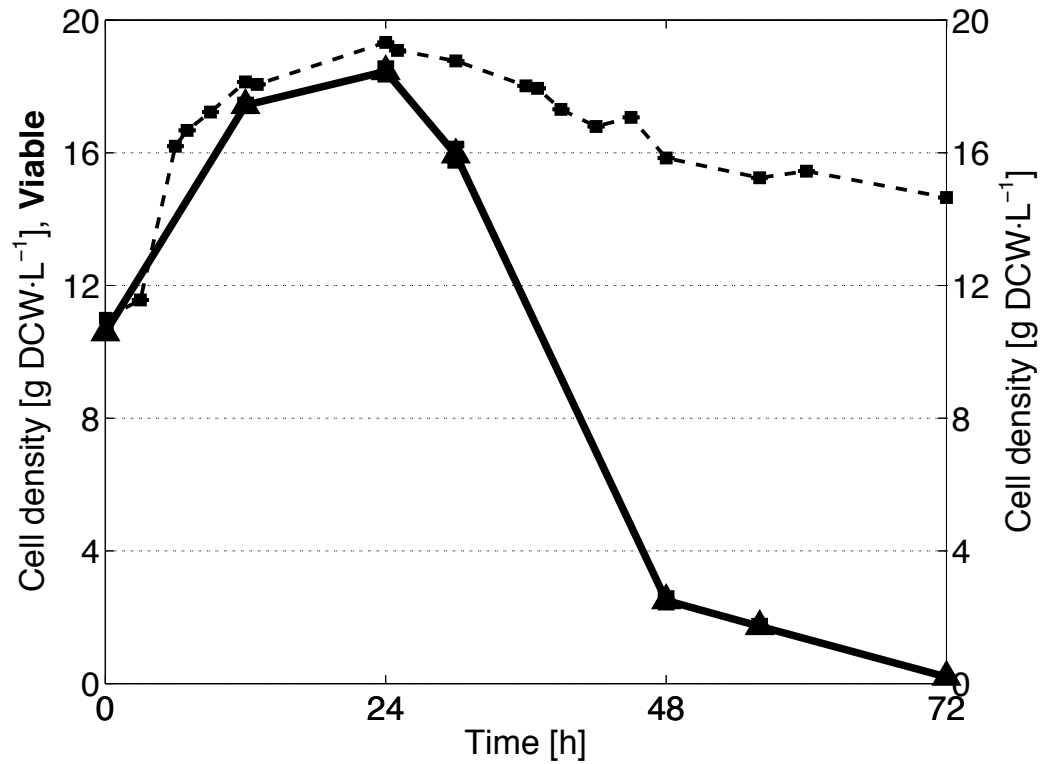

**Fig. S6.** Elevated potassium and pH enhance ethanol production in an anaerobic bioreactor environment. **(A)** Time course of ethanol production (black solid), glucose consumption (black dashed), and pH (blue). Manual additions of 2 mM KOH are indicated by blue arrows. **(B)** Corresponding time course of cell density (dashed) and the underlying viable cell population (solid).

**Fig. S7 A)**

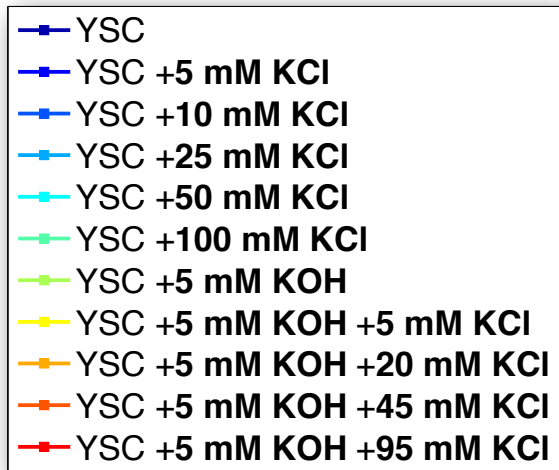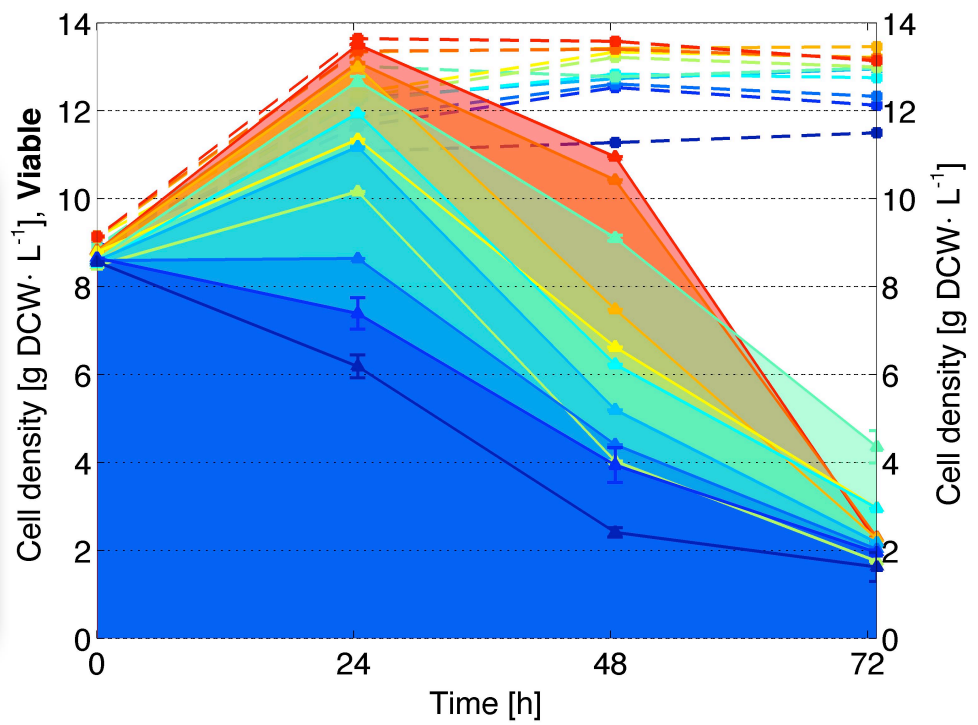

**B)**

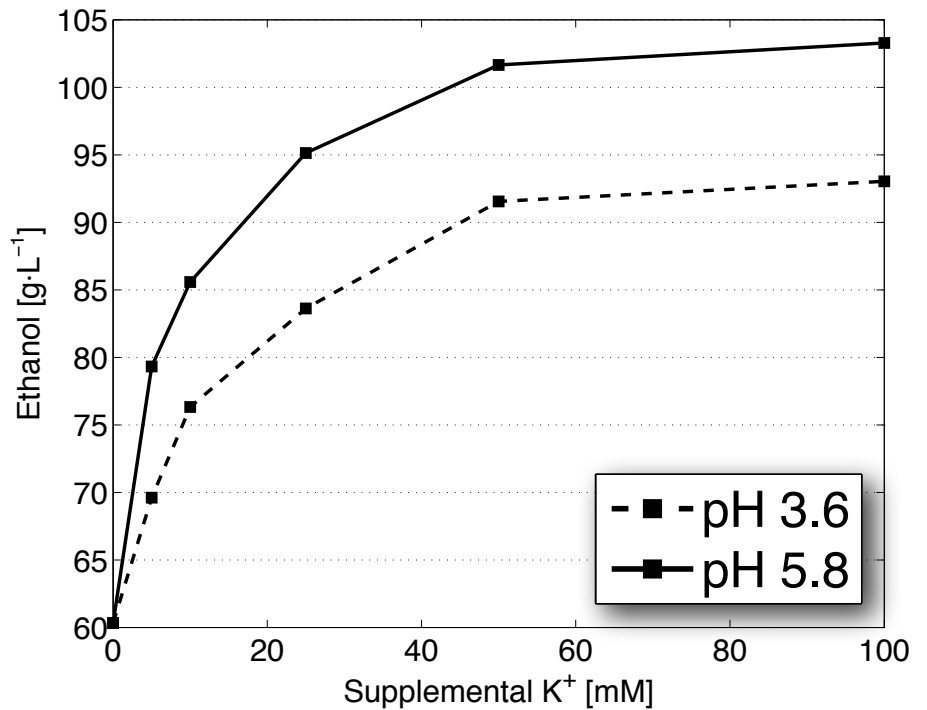

**Fig. S7.** Elevated potassium and pH exert saturable, dose-dependent improvements on ethanol tolerance and production. **(A)** Cell densities (dashed) and the corresponding time integrals of the viable cell population (shaded) from fermentations supplemented with 5–100 mM KCl (pH 3.6), or with 5 mM KOH and 5–95 mM KCl (i.e., equimolar potassium at pH 5.8). **(B)** Final ethanol titers of the fermentations in A shown as a function of supplemental potassium at the two pH values.

**Fig. S8**

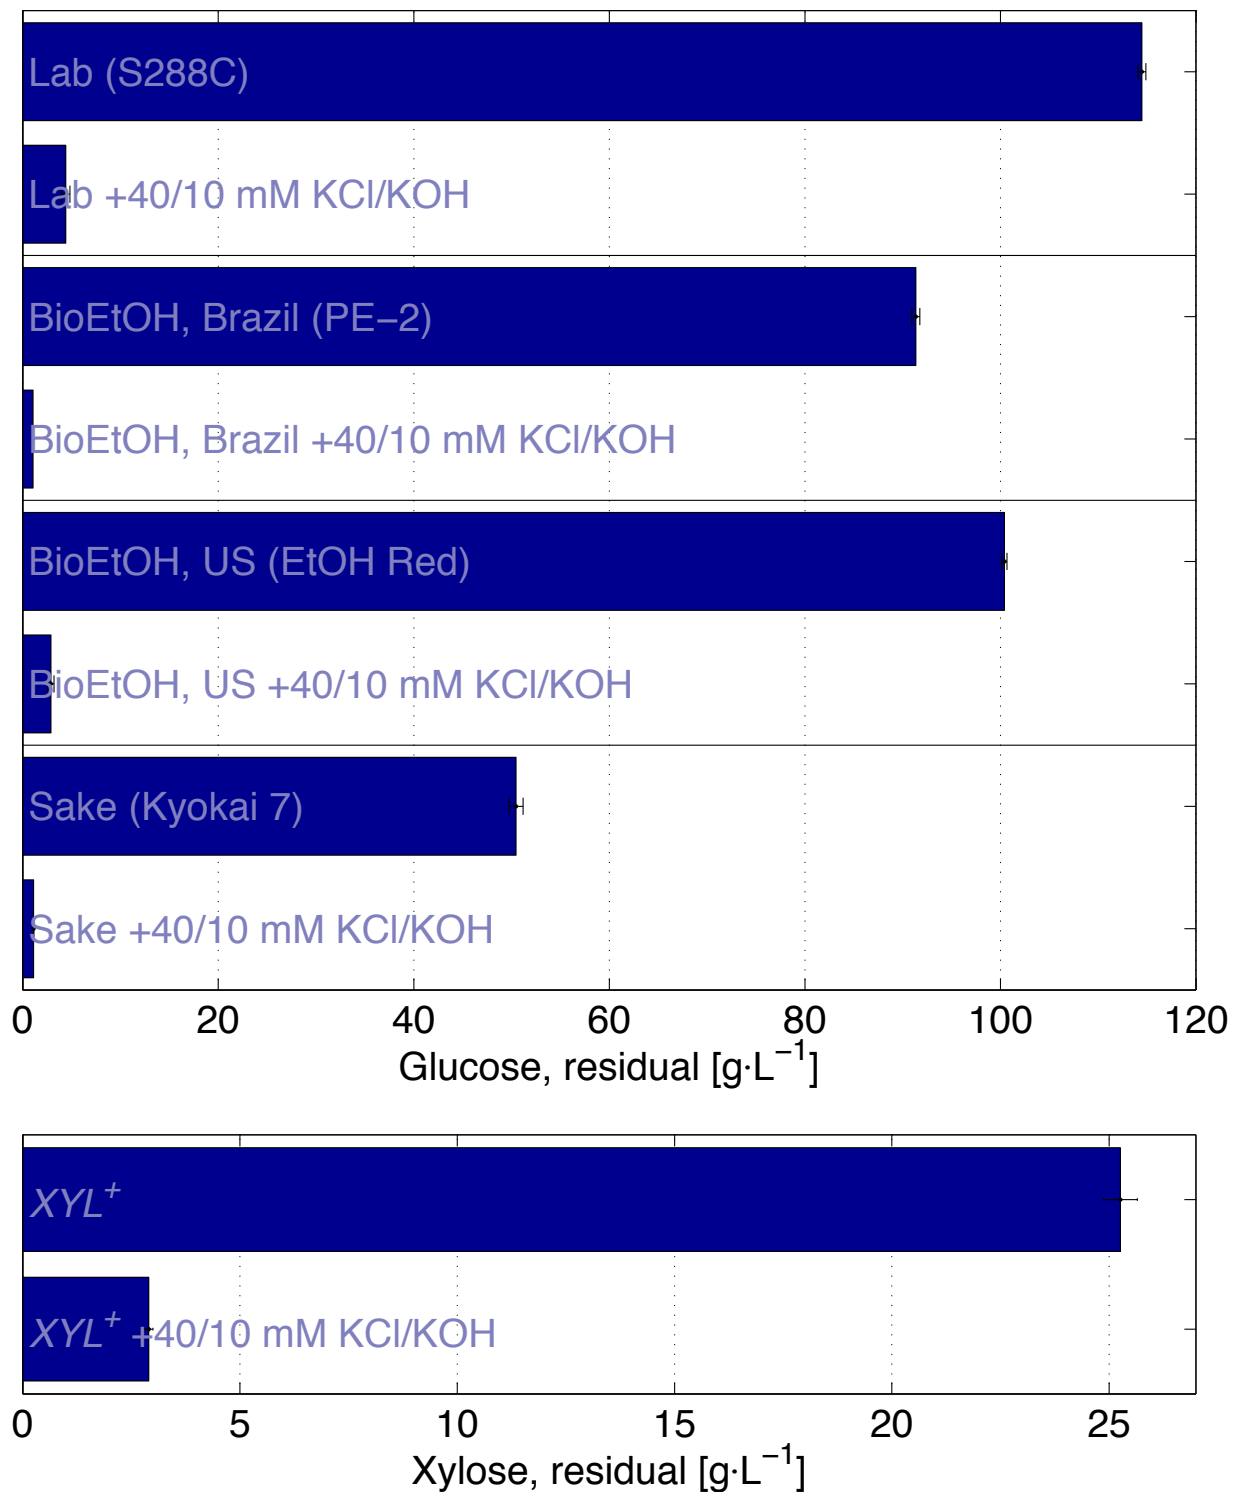

**Fig. S8.** Elevated potassium and pH are sufficient to induce complete consumption of fermentation sugar independently of strain genetics and sugar substrate. Residual sugar from glucose fermentation (top) of one laboratory (S288C) and three industrial (PE-2, Ethanol Red, Kyokai 7) yeast strains, or from xylose fermentation (bottom) of an engineered xylose strain, grown in unmodified YSC or YSC supplemented with 40 mM KCl and 10 mM KOH. Corresponding ethanol titers are shown in Fig. 2A. Data are mean  $\pm$  SD from 3 biological replicates.

**Fig. S9**

**A)**

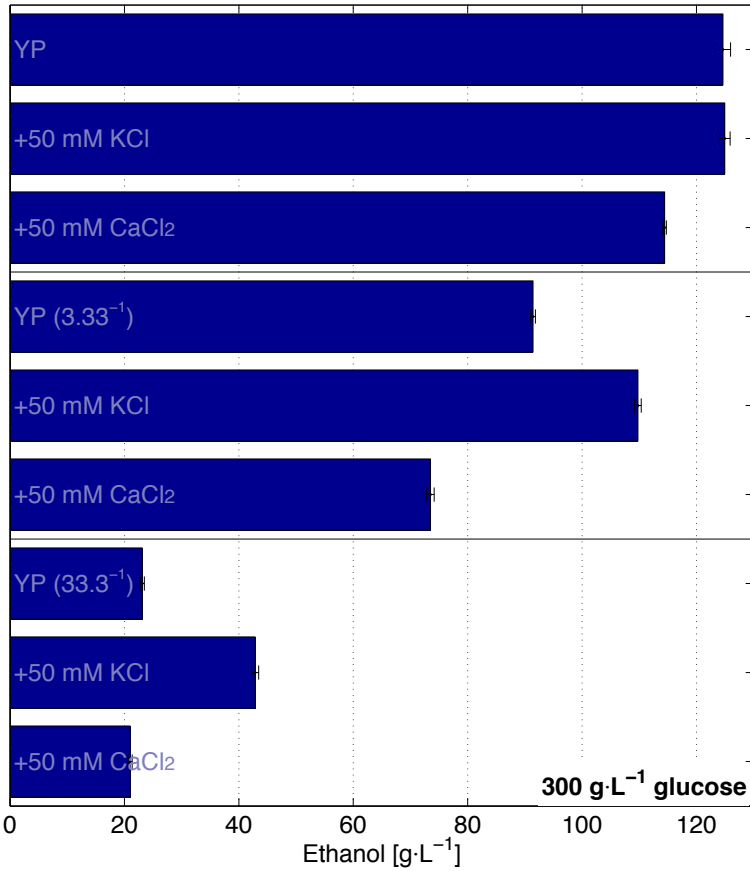

**B)**

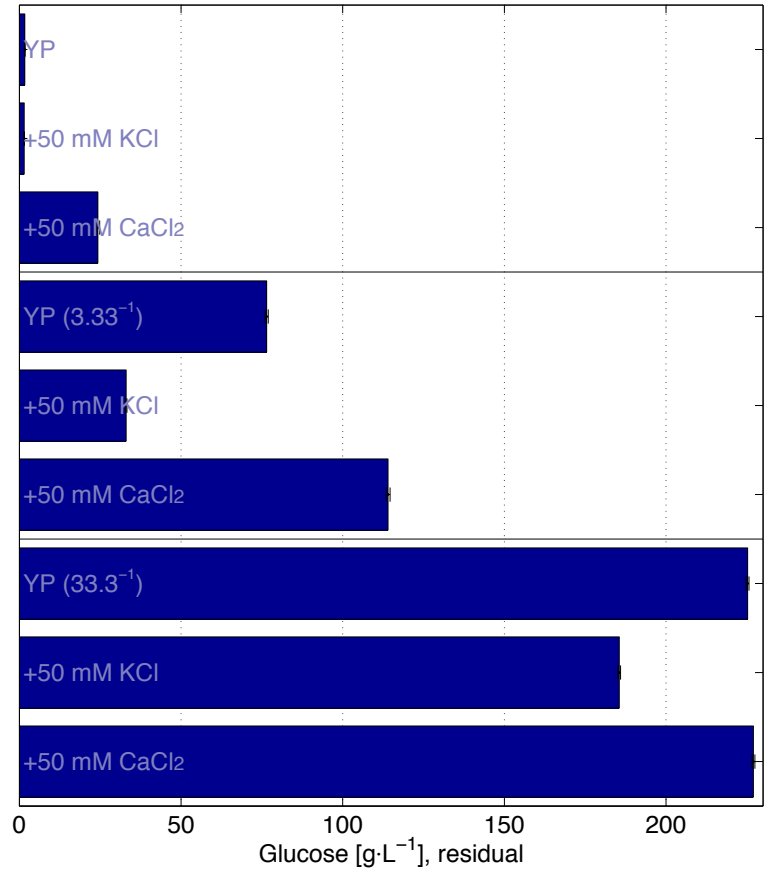

**Fig. S9.** Elevated potassium is sufficient to enhance fermentation in chemically undefined medium containing yeast extract and peptone (YP). **(A)** Ethanol titers from S288C cultured in undiluted YP, YP diluted to 30%, or YP diluted to 3%, all containing 300 g/L glucose and supplemented with either 50 mM potassium (as KCl) or calcium (as CaCl<sub>2</sub>). **(B)** Residual glucose from the fermentations in **A**. Data are mean  $\pm$  SD from 3 biological replicates.

**Fig. S10A)**

--▲-- YSC  
—▲— YSC +50 mM K-Pi

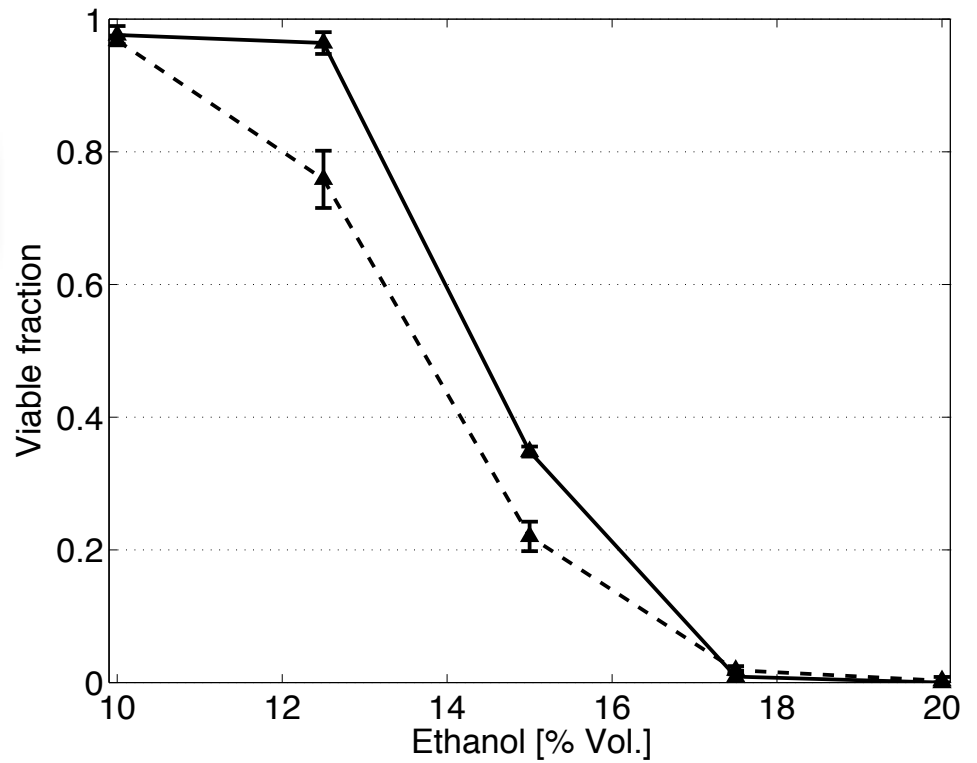

**B)**

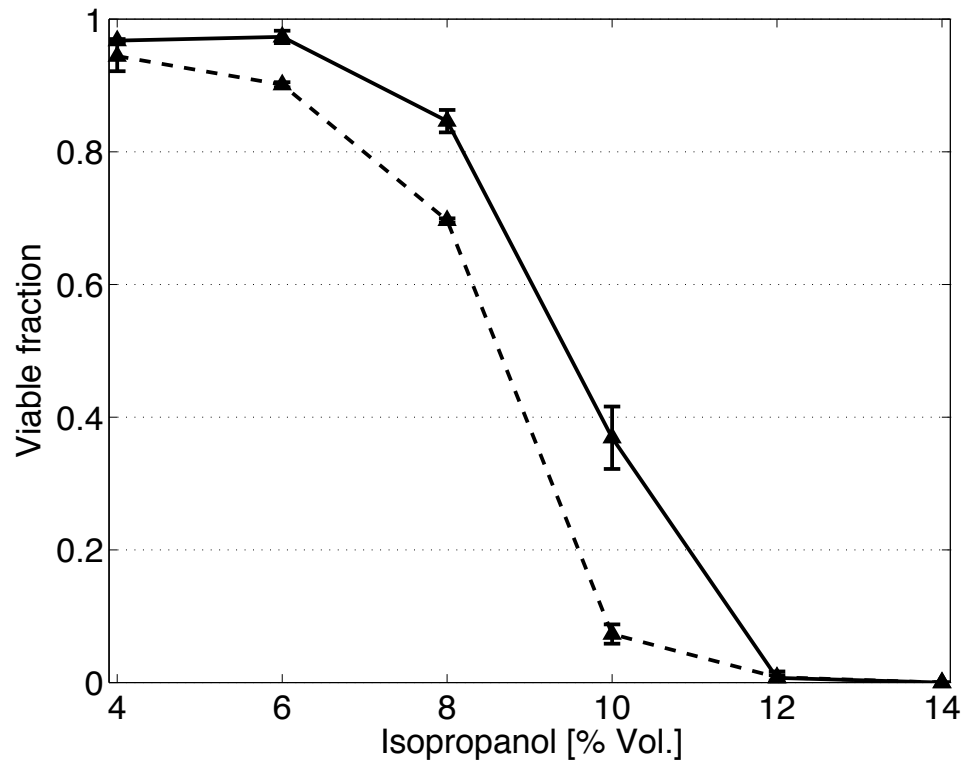

**Fig. S10.** Elevated potassium and pH are sufficient to enhance tolerance independently of alcohol species under high glucose conditions. **(A)** Population fractions surviving 135 min after transfer from overnight growth in unmodified YSC containing 300 g/L glucose (dashed), or that supplemented with 50 mM K-Pi (solid), into identical conditions containing the indicated concentrations of ethanol. **(B)** Same as **A**, but with steps of isopropanol and measurements after 4 h. Data are mean  $\pm$  SD from 3 biological replicates.

**Fig. S11**

**A)**

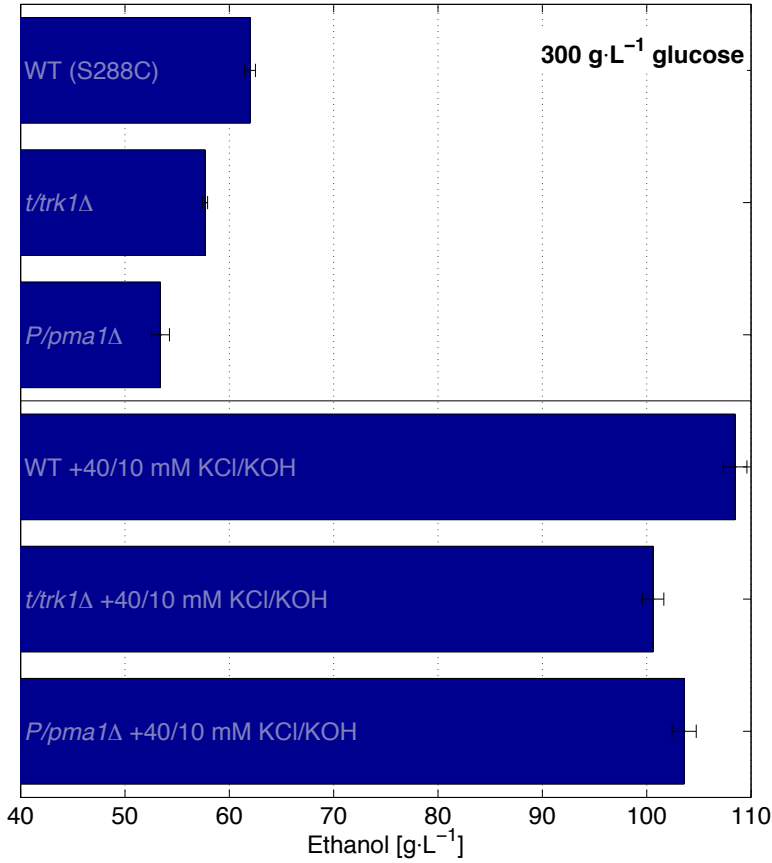

**B)**

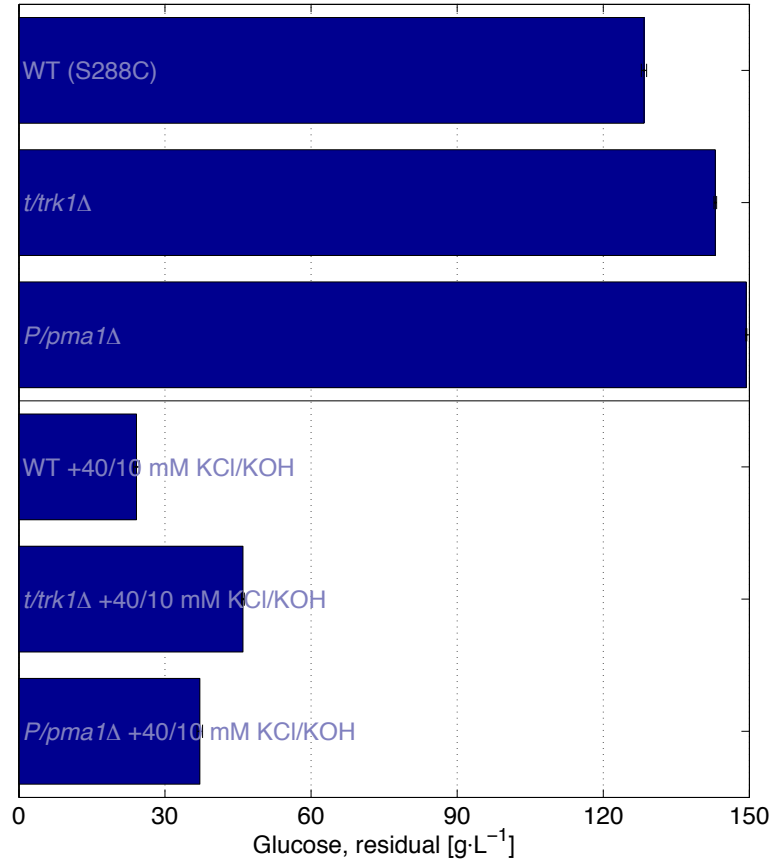

**Fig. S11.** Genetic impairment of potassium import or proton export decreases ethanol performance. **(A)** Ethanol titers from an auxotrophic wild type laboratory strain (S288C-based BY4743), an isogenic derivative harboring a homozygous deletion of the potassium pump (*trk1*Δ/*trk1*Δ), and an isogenic derivative with a heterozygous deletion of the proton pump (*PMA1*/*pma1*Δ), all cultured in unmodified YSC (top) or YSC supplemented with 40 mM KCl and 10 mM KOH (bottom). **(B)** Residual glucose from the fermentations in **A**. Data are mean ± SD from 3 biological replicates.



**Fig. S12A)**

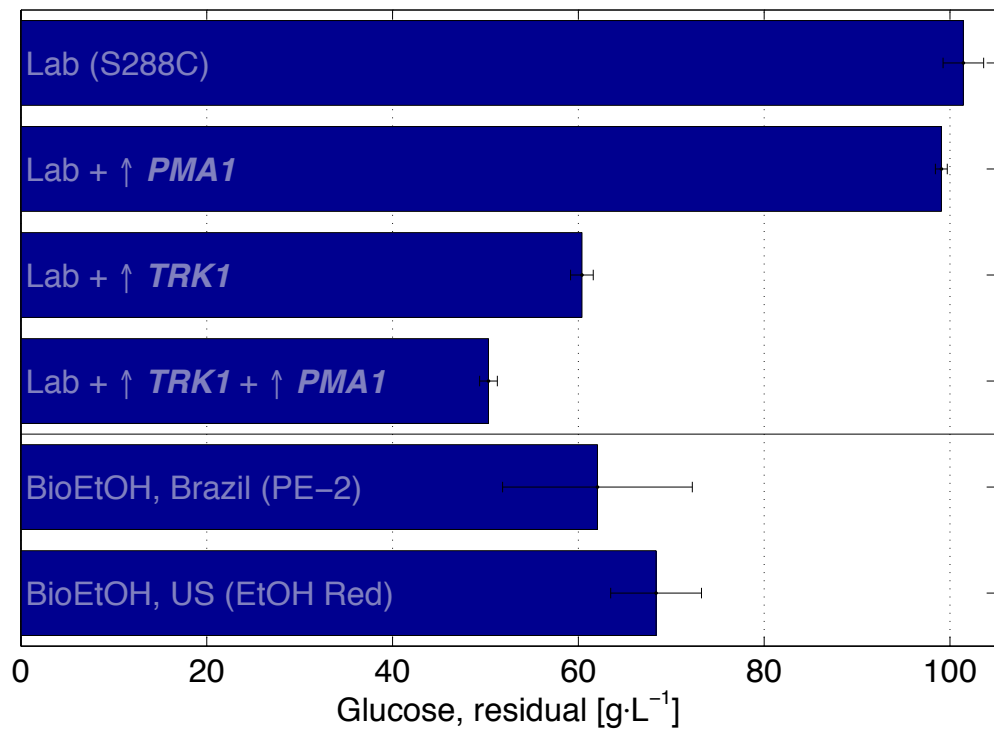

**B)**

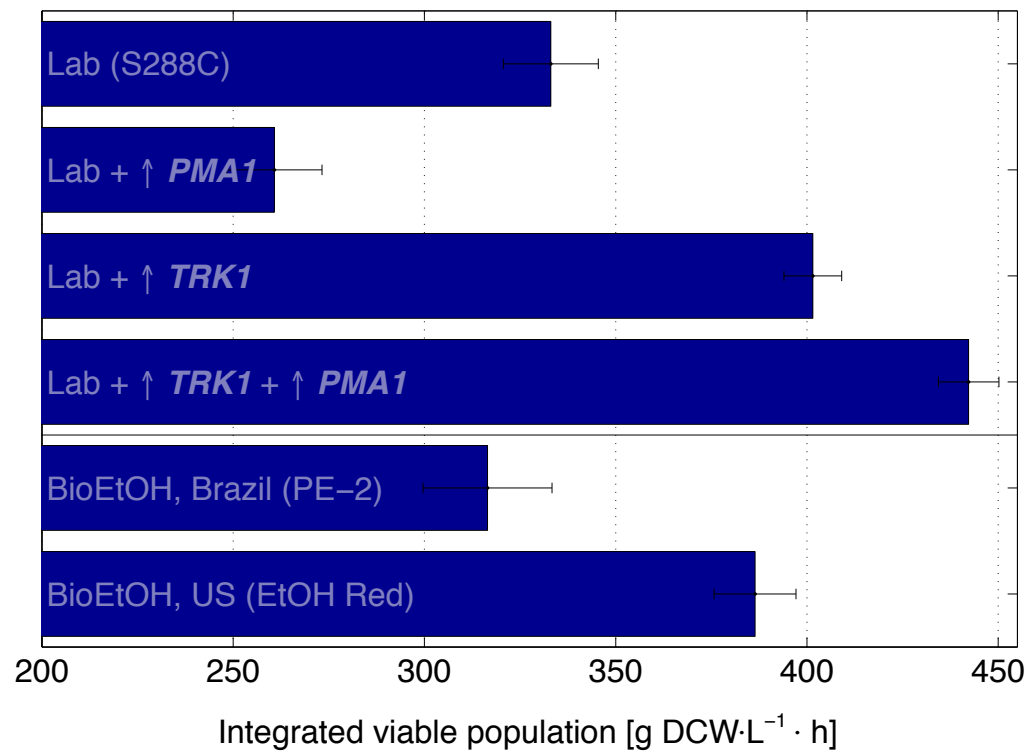

**Fig. S12.** Genetic augmentation of the plasma membrane potassium (*TRK1*) and proton (*PMA1*) pumps enhance ethanol tolerance and fermentation. **(A)** Residual glucose from a wild type laboratory strain (S288C) transformed with empty over-expression plasmid, S288C transformed with a plasmid over-expressing *PMA1*, S288C containing hyper-activated *TRK1* (via deletions of *PPZ1* and *PPZ2*) and transformed with empty over-expression plasmid, the *TRK1* hyper-activated strain transformed with a plasmid over-expressing *PMA1*, and bioethanol production strains from Brazil (PE-2) and the US (Ethanol Red), all cultured in unmodified YSC lacking uracil. Corresponding ethanol titers are shown in Fig. 3. **(B)** Net fermentation viability (time integrals of the viable population) from the fermentations in **A** and Fig. 3. Data are mean  $\pm$  SD from 3 biological replicates.

**Fig. S13A)**

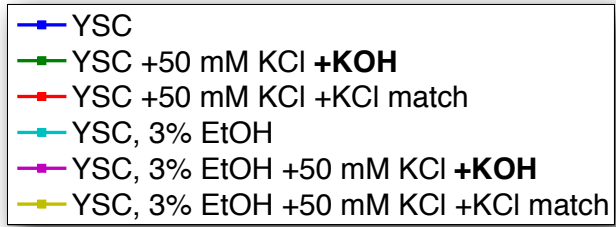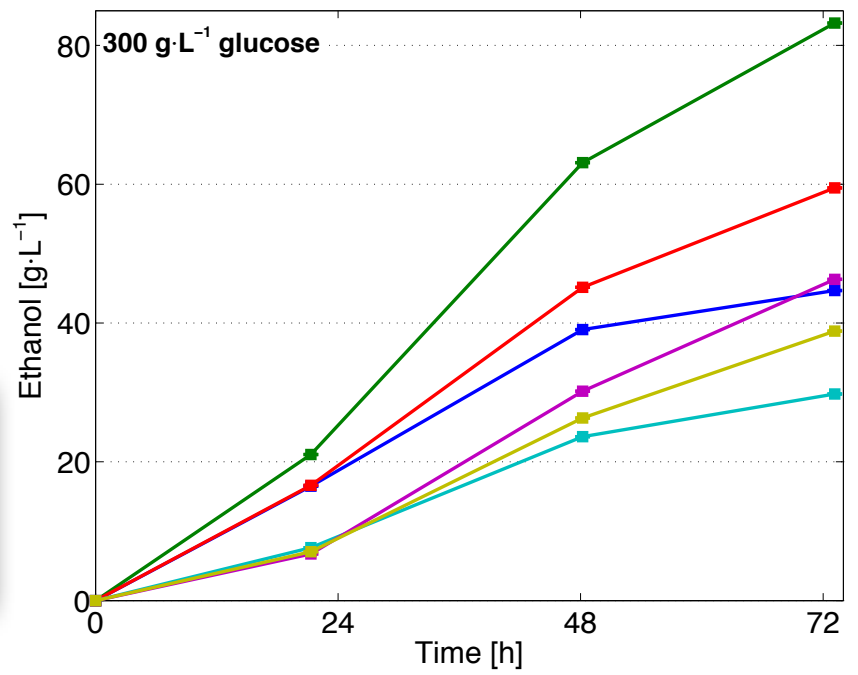

**B)**

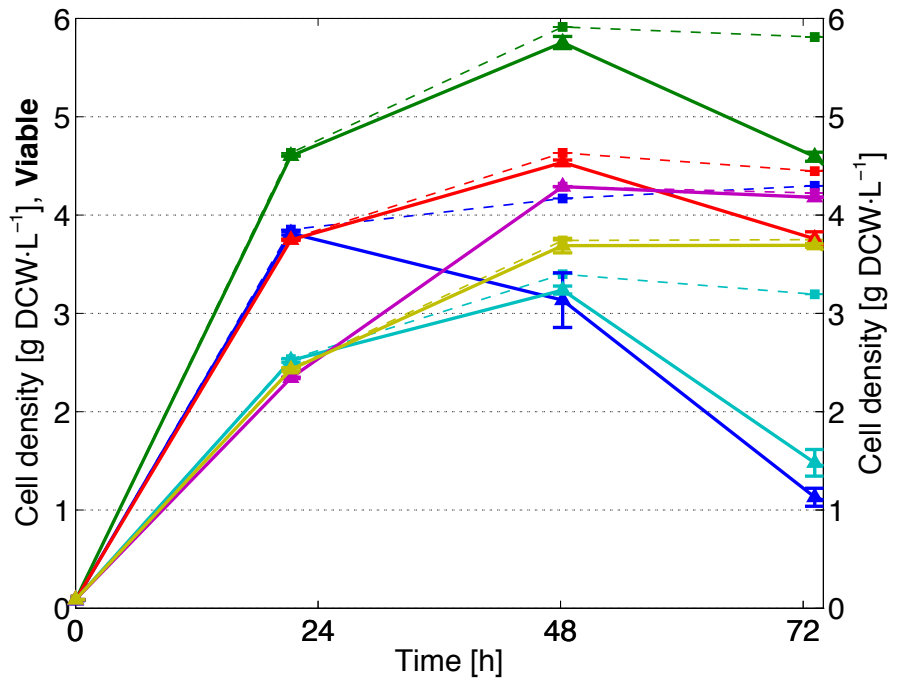

**Fig. S13.** Elevated potassium and pH enhance ethanol production and tolerance when nutrients remain in abundance, both in the absence and presence of a 3% ethanol stress. All cultures were equalized for initial pH (3.8) and cell density ( $OD_{600} = 0.1$  or  $0.04$  g DCW/L). **(A)** Time course of ethanol production. **(B)** Time course of cell densities (dashed) and the underlying viable cell population (solid).

**Table S1.** Yeast strains.

| Strain                                                  | Genotype                                                                                                                    | Reference                      |
|---------------------------------------------------------|-----------------------------------------------------------------------------------------------------------------------------|--------------------------------|
| BY4743                                                  | S288C <i>MATa/α his3Δ1/his3Δ1 leu2Δ0/leu2Δ0 LYS2/lys2Δ0 met15Δ0/MET15 ura3Δ0/ura3Δ0</i>                                     | (32)                           |
| Ethanol Red                                             | American bioethanol production strain (prototrophic)                                                                        | Gift from Phibro Animal Health |
| FY4/5                                                   | S288C <i>MATa/α</i> (prototrophic)                                                                                          | (32)                           |
| LAMy123                                                 | BY4743 p426TEF                                                                                                              | This study                     |
| LAMy177                                                 | BY4743 <i>ppz1Δ::kanMX4/ppz1Δ::kanMX4 ppz2Δ::kanMX4/ppz2Δ::kanMX4</i>                                                       | This study                     |
| LAMy184                                                 | BY4743 p426TEF- <i>PMA1</i>                                                                                                 | This study                     |
| LAMy189                                                 | LAMy177 p426TEF- <i>PMA1</i>                                                                                                | This study                     |
| LAMy191                                                 | LAMy177 p426TEF                                                                                                             | This study                     |
| Kyokai No. 7 / NCYC 479                                 | Sake brewing strain (prototrophic)                                                                                          | (14)                           |
| PE-2 / JAY270                                           | Brazilian bioethanol production strain (prototrophic)                                                                       | (13)                           |
| <i>PMA1/pma1Δ</i>                                       | BY4743 <i>PMA1/pma1Δ::kanMX4</i>                                                                                            | (33)                           |
| <i>trk1Δ/trk1Δ</i>                                      | BY4743 <i>trk1Δ::kanMX4/trk1Δ::kanMX4</i>                                                                                   | (33)                           |
| <i>XYL<sup>+</sup> / H131-A3-AL<sup>CS</sup> / F283</i> | BF264-15Dau, <i>TRP1::pTDH3-RK11-tCYC1-pTDH3-RPE1-tCYC1, HIS2::pTDH3-TKLI-tCYC1, ADE1::pTDH3-PsTAL1-tCYC1</i> pUCAR1 pRS405 | (16)                           |

**Table S2.** Over-expression plasmids.

| Plasmid              | Insert                    | Reference  |
|----------------------|---------------------------|------------|
| p426TEF              | —                         | (28)       |
| p426TEF- <i>PMA1</i> | <i>S. cerevisiae PMA1</i> | This study |

**Table S3.** Fermentation conditions.

| Fig. | Strain                   | Medium   | Sugar (glucose / xylose) + Additive                                                                                                                                                                                                                                                                                                                      | OD <sub>600,t0</sub> |
|------|--------------------------|----------|----------------------------------------------------------------------------------------------------------------------------------------------------------------------------------------------------------------------------------------------------------------------------------------------------------------------------------------------------------|----------------------|
| 1A-B | FY4/5                    | YSC      | <b>glc:</b> 100 g/L → 150 g/L → 300 g/L ± 40 mM KCl + 10 mM KOH/KCl (during ferm.)<br>↳ 300 g/L + 10 mM KOH (during ferm.)                                                                                                                                                                                                                               | 25                   |
| S4   |                          |          |                                                                                                                                                                                                                                                                                                                                                          |                      |
| S5   |                          |          |                                                                                                                                                                                                                                                                                                                                                          |                      |
| 1C   | FY4/5                    | YSC      | <b>glc:</b> 100 g/L → 150 g/L → 300 g/L ± [5, 10, 25, 50, 100] mM KCl<br>↳ 300 g/L + 5 mM KOH ± [5, 20, 45, 95] mM KCl                                                                                                                                                                                                                                   | 22                   |
| S7   |                          |          |                                                                                                                                                                                                                                                                                                                                                          |                      |
| 2A   | FY4/5                    | YSC      | <b>glc:</b> 100 g/L → 150 g/L → 300 g/L ± 40 mM KCl + 10 KOH (during ferm.)                                                                                                                                                                                                                                                                              | 25                   |
|      | PE-2                     | YSC      | <b>glc:</b> 100 g/L → 150 g/L → 300 g/L ± 40 mM KCl + 10 KOH (during ferm.)                                                                                                                                                                                                                                                                              | 25                   |
|      | Ethanol Red              | YSC      | <b>glc:</b> 100 g/L → 150 g/L → 300 g/L ± 40 mM KCl + 10 KOH (during ferm.)                                                                                                                                                                                                                                                                              | 25                   |
| S8   | Kyokai No. 7             | YSC      | <b>glc:</b> 100 g/L → 150 g/L → 300 g/L ± 40 mM KCl + 10 KOH (during ferm.)                                                                                                                                                                                                                                                                              | 25                   |
|      | H131-A3-AL <sup>CS</sup> | YSC      | <b>xyl:</b> 40 g/L → 60 g/L → 100 g/L ± 40 mM KCl + 10 KOH (during ferm.)                                                                                                                                                                                                                                                                                | 25                   |
| 2B   | FY4/5                    | YP (20%) | <b>glc:</b> 100 g/L → 150 g/L → 300 g/L ± 50 mM KCl (pH 6)<br>↳ 300 g/L ± 50 mM KCl (pH 3.7)                                                                                                                                                                                                                                                             | 24                   |
| 3    | LAMy123                  | YSC -URA | <b>glc:</b> 100 g/L → 150 g/L → 300 g/L (Lab)                                                                                                                                                                                                                                                                                                            | 20                   |
|      | LAMy184                  | YSC -URA | <b>glc:</b> 100 g/L → 150 g/L → 300 g/L (Lab + ↑ <i>PMAI</i> )                                                                                                                                                                                                                                                                                           | 20                   |
|      | LAMy191                  | YSC -URA | <b>glc:</b> 100 g/L → 150 g/L → 300 g/L (Lab + ↑ <i>TRK1</i> )                                                                                                                                                                                                                                                                                           | 20                   |
| S12  | LAMy189                  | YSC -URA | <b>glc:</b> 100 g/L → 150 g/L → 300 g/L (Lab + ↑ <i>TRK1</i> + ↑ <i>PMAI</i> )                                                                                                                                                                                                                                                                           | 20                   |
|      | PE-2                     | YSC -URA | <b>glc:</b> 100 g/L → 150 g/L → 300 g/L (Bioethanol, Brazil)                                                                                                                                                                                                                                                                                             | 20                   |
|      | Ethanol Red              | YSC -URA | <b>glc:</b> 100 g/L → 150 g/L → 300 g/L (Bioethanol, US)                                                                                                                                                                                                                                                                                                 | 20                   |
| S1   | FY4/5                    | YSC      | <b>glc:</b> 100 g/L → 150 g/L → 300 g/L ± 10 mM [L-histidine, L-leucine]<br>↳ 300 g/L + 50 mM [CaCl <sub>2</sub> , LiCl, MgCl <sub>2</sub> , KCl, KH <sub>2</sub> PO <sub>4</sub> , K <sub>2</sub> HPO <sub>4</sub> , K <sub>2</sub> SO <sub>4</sub> , NaCl, NaH <sub>2</sub> PO <sub>4</sub> , NaCH <sub>3</sub> COO, Na <sub>2</sub> SO <sub>3</sub> ] | 25                   |

| Fig. | Strain             | Medium   | Sugar (glucose / xylose) + Additive                                                                                                                                                                                                                                         | OD <sub>600,t0</sub> |
|------|--------------------|----------|-----------------------------------------------------------------------------------------------------------------------------------------------------------------------------------------------------------------------------------------------------------------------------|----------------------|
| S2   | FY4/5              | YSC      | <b>glc:</b> 100 g/L → 150 g/L → 300 g/L ± 50 mM KH <sub>2</sub> PO <sub>4</sub><br>↳ 300 g/L + 50 mM KCl +KOH (during ferm.)<br>↳ 300 g/L + 50 mM KCl +KCl (during ferm.)                                                                                                   | 23                   |
| S3   | FY4/5              | YSC      | <b>glc:</b> 100 g/L → 150 g/L → 300 g/L ± 50 mM [KCl, KH <sub>2</sub> PO <sub>4</sub> , K <sub>2</sub> SO <sub>4</sub> , NaCl, NaH <sub>2</sub> PO <sub>4</sub> ]<br>↳ 300 g/L + 40 mM KCl + 10 mM KOH (during ferm.)<br>↳ 300 g/L + 40 mM NaCl + 10 mM NaOH (during ferm.) | 25                   |
| S6   | FY4/5              | YSC      | <b>glc:</b> 100 g/L → 150 g/L → 300 g/L + 40 mM KCl + 10 KOH (during ferm.)                                                                                                                                                                                                 | 27                   |
| S9   | FY4/5              | YP       | <b>glc:</b> 100 g/L → 150 g/L → 300 g/L ± 50 mM [CaCl <sub>2</sub> , KCl]                                                                                                                                                                                                   | 26                   |
|      |                    | YP (30%) | <b>glc:</b> 100 g/L → 150 g/L → 300 g/L ± 50 mM [CaCl <sub>2</sub> , KCl]                                                                                                                                                                                                   | 26                   |
|      |                    | YP (3%)  | <b>glc:</b> 100 g/L → 150 g/L → 300 g/L ± 50 mM [CaCl <sub>2</sub> , KCl]                                                                                                                                                                                                   | 26                   |
| S11  | BY4743             | YSC      | <b>glc:</b> 100 g/L → 150 g/L → 300 g/L ± 40 mM KCl + 10 KOH (during ferm.)                                                                                                                                                                                                 | 23                   |
|      | <i>trk1Δ/trk1Δ</i> | YSC      | <b>glc:</b> 100 g/L → 150 g/L → 300 g/L ± 40 mM KCl + 10 KOH (during ferm.)                                                                                                                                                                                                 | 23                   |
|      | <i>PMA1/pma1Δ</i>  | YSC      | <b>glc:</b> 100 g/L → 150 g/L → 300 g/L ± 40 mM KCl + 10 KOH (during ferm.)                                                                                                                                                                                                 | 23                   |
| S13  | FY4/5              | YSC      | <b>glc:</b> 100 g/L → 150 g/L → 300 g/L ± 3% ethanol<br>↳ 300 g/L ± 3% ethanol + 50 mM KCl +KOH (during ferm.)<br>↳ 300 g/L ± 3% ethanol + 50 mM KCl +KCl (during ferm.)                                                                                                    | 0.1                  |
